# Supplementary material for: Dos and Don'ts in Designing School-Based Awareness Programs for Suicide Prevention
Source: Atypon-hosted journal article supplement (doi:10.1027/0227-5910/a000783), 2021-05-27
Supplement: 0227-5910_a000783_esm1.pdf [file 0227-5910_a000783_esm1.pdf]

**Electronic Supplementary Material****Table S1***Contents of an Awareness Program Rated on Their Effectivity for Suicide Prevention*

| Content                                                                                                                                | Median | IQR |
|----------------------------------------------------------------------------------------------------------------------------------------|--------|-----|
| 1. Information on where to find help (in the community, at school)                                                                     | 5      | 1   |
| 2. Awareness and definition of mental health                                                                                           | 4      | 1   |
| 3. Strategies to maintain a good mental health                                                                                         | 4      | 1   |
| 4. Risk taking behaviors and possible consequences                                                                                     | 4      | 1   |
| 5. Awareness and definition of (non-pathological) emotional distress                                                                   | 4      | 1   |
| 6. Information on typical stressors and stress reaction                                                                                | 4      | 1   |
| 7. Strategies to cope with stress                                                                                                      | 4      | 1   |
| 8. Strategies to influence feelings                                                                                                    | 4      | 1   |
| 9. Information on anxiety                                                                                                              | 4      | 1   |
| 10. Information on self-injury                                                                                                         | 4      | 1   |
| 11. Information on mental disorders in general                                                                                         | 4      | 1   |
| 12. Information on substance use                                                                                                       | 4      | 1   |
| 13. Myths and false believes about suicidality (e.g. asking someone about suicidality will cause him to take his/her own life)         | 4      | 1   |
| 14. Description of warning signs of suicidality                                                                                        | 4      | 1   |
| 15. Experiences of real people around suicide                                                                                          | 4      | 1   |
| 16. Communicate that suicidality requires professional treatment                                                                       | 4      | 1   |
| 17. Characterization of suicidality as a symptom of psychopathology (and not as a possible reaction to stress)                         | 4      | 1   |
| 18. Communicate that suicide can be prevented                                                                                          | 4      | 1   |
| 19. Create cognitive dissonance about suicide as an option for coping with extreme stress (i.e. "suicide is not an option/a solution") | 4      | 1   |

| Content                                                                                                   | Median | IQR |
|-----------------------------------------------------------------------------------------------------------|--------|-----|
| <b>20. Information on treatment for mental health problems</b>                                            | 4      | 1   |
| <b>21. Instructions on how to react helpfully to suicidal peers</b>                                       | 4      | 1   |
| <b>22. Instruction on how to act if oneself is feeling suicidal</b>                                       | 4      | 1   |
| <b>23. Elucidation of possible outcomes of help-seeking efforts</b>                                       | 4      | 1   |
| <b>24. Communication training (e.g. how to talk about problems, how to ask for help)</b>                  | 4      | 1   |
| <b>25. Problem-solving training</b>                                                                       | 4      | 1   |
| <b>26. Information and coping strategies for bullying</b>                                                 | 4      | 1   |
| <b>27. Awareness of stigmatization of mental disorders and help-seeking and its consequences</b>          | 4      | 1   |
| <b>28. Awareness of suicidality as a problem of concern</b>                                               | 4      | 1   |
| 29. Information on depression                                                                             | 4      | 2   |
| 30. Information on characteristics of suicidality as prevalence, causes, risk factors, protective factors | 4      | 2   |

*Note.* Items for which consensus was reached are highlighted in bold. Items were rated on a 5-point Likert scale from 1 (*very detrimental*), 2 (*somewhat detrimental*), 3 (*neutral / mixed*), 4 (*somewhat effective*) to 5 (*very effective*).

**Table S2***Importance, Effectiveness and Feasibility of Outcomes of Awareness Programs*

| Outcome                                                                    | Importance <sup>a</sup> |      | Effectiveness <sup>b</sup> |            | Feasibility <sup>b</sup> |            |
|----------------------------------------------------------------------------|-------------------------|------|----------------------------|------------|--------------------------|------------|
|                                                                            | <i>n</i>                | %    | <i>Me-<br/>dian</i>        | <i>IQR</i> | <i>Me-<br/>dian</i>      | <i>IQR</i> |
| 1. Improvement of help-seeking behavior                                    | 10                      | 83.3 | 3                          | 1          | 3                        | 2          |
| 2. <b>Improvement of willingness to seek help for oneself if needed</b>    | 10                      | 83.3 | 3                          | 1          | 3                        | 1          |
| 3. Reduction of number of non-fatal suicide attempts <sup>c</sup>          | 8                       | 66.7 | -                          | -          | 2                        | 1          |
| 4. Improvement of helping behaviors towards peers                          | 6                       | 50.0 | 3                          | 2          | 3                        | 1          |
| 5. <b>Improvement of readiness to communicate distress to others</b>       | 4                       | 33.3 | 3                          | 1          | 3                        | 1          |
| 6. <b>Increase of knowledge of warning signs for suicidality</b>           | 3                       | 25.0 | 3                          | 1          | 3                        | 1          |
| 7. Reduction of feelings of hopelessness                                   | 3                       | 25.0 | 3                          | 1          | 2                        | 1          |
| 8. <b>Improvement of knowledge of available professional help</b>          | 3                       | 25.0 | 3                          | 1          | 3                        | 1          |
| 9. Reduction of (severe) suicide ideation <sup>c</sup>                     | 2                       | 16.7 | -                          | -          | 2                        | 1          |
| 10. Reduction of number of fatal suicide attempts <sup>c</sup>             | 2                       | 16.7 | -                          | -          | 2                        | 1          |
| 11. Improved confidence that help is possible/reduce feeling of entrapment | 2                       | 16.7 | 3                          | 1          | 2.5                      | 2          |

| Outcome                                                                                                      | Importance <sup>a</sup> |      | Effectiveness <sup>b</sup> |            | Feasibility <sup>b</sup> |            |
|--------------------------------------------------------------------------------------------------------------|-------------------------|------|----------------------------|------------|--------------------------|------------|
|                                                                                                              | <i>n</i>                | %    | <i>Me-<br/>dian</i>        | <i>IQR</i> | <i>Me-<br/>dian</i>      | <i>IQR</i> |
| 12. <b>More trusting attitude about helpers (e.g. school counsellor)</b>                                     | 2                       | 16.7 | 3                          | 1          | 3                        | 1          |
| 13. Reduction of feelings of social isolation                                                                | 1                       | 8.3  | 3                          | 2          | 2.5                      | 1          |
| 14. <b>Improvement of willingness to seek help for peers if needed</b>                                       | 1                       | 8.3  | 3                          | 1          | 3                        | 1          |
| 15. Decrease of stigmatization of suicidality                                                                | 1                       | 8.3  | 2.5                        | 2          | 2.5                      | 1          |
| 16. Decrease of stigmatization of help-seeking                                                               | 1                       | 8.3  | 3                          | 2          | 3                        | 1          |
| 17. Improvement of skills to deal with emotional distress                                                    | 1                       | 8.3  | 3                          | 1          | 2                        | 1          |
| 18. <b>Improvement of quality of reaction to disclosure of suicidality by peers</b>                          | 1                       | 8.3  | 3                          | 1          | 3                        | 1          |
| 19. <b>Reduction of mental health problems</b>                                                               | 0                       | 0    | 3                          | 1          | 3                        | 1          |
| 20. <b>Increase of knowledge of symptoms of depression</b>                                                   | 0                       | 0    | 3                          | 1          | 3                        | 1          |
| 21. <b>Increase of knowledge of causes and risk factors of suicide</b>                                       | 0                       | 0    | 3                          | 1          | 3                        | 1          |
| 22. Better accessibility of knowledge (i.e. know where to find information)                                  | 0                       | 0    | 3                          | 1          | 2.5                      | 1          |
| 23. Improvement of communication skills                                                                      | 0                       | 0    | 2.5                        | 1          | 3                        | 1          |
| 24. More adaptive attitudes toward suicidality: suicidality is common/most individuals could become affected | 0                       | 0    | 3                          | 1          | 2.5                      | 1          |

| Outcome                                                                                            | Importance <sup>a</sup> |   | Effectiveness <sup>b</sup> |            | Feasibility <sup>b</sup> |            |
|----------------------------------------------------------------------------------------------------|-------------------------|---|----------------------------|------------|--------------------------|------------|
|                                                                                                    | <i>n</i>                | % | <i>Me-<br/>dian</i>        | <i>IQR</i> | <i>Me-<br/>dian</i>      | <i>IQR</i> |
| 25. More adaptive attitudes toward suicidality: suicide is preventable                             | 0                       | 0 | 3                          | 1          | 3                        | 2          |
| 26. More adaptive attitudes toward suicidality: suicidality must be taken seriously                | 0                       | 0 | 4                          | 1          | 3                        | 2          |
| 27. Improvement of positive goals for the future                                                   | 0                       | 0 | 2.5                        | 1          | 2.5                      | 1          |
| 28. Improvement of problem-solving skills                                                          | 0                       | 0 | 2                          | 1          | 3                        | 1          |
| 29. More adaptive attitudes toward suicidality: suicidality requires professional treatment        | 0                       | 0 | 3                          | 2          | 3                        | 2          |
| 30. More adaptive attitudes toward suicidality: it is important to take care of your mental health | 0                       | 0 | 3                          | 1          | 3                        | 2          |
| 31. Decrease of stigmatization of mental illness                                                   | 0                       | 0 | 2                          | 1          | 3                        | 2          |
| 32. Reduction of depressiveness                                                                    | 0                       | 0 | 2                          | 1          | 3                        | 1          |
| 33. More adaptive attitudes toward suicidality: in case of suicidality, fetch a trusted adult      | 0                       | 0 | 3                          | 1          | 3                        | 2          |
| 34. More adaptive attitudes toward suicidality: suicide is something you can openly talk about     | 0                       | 0 | 3                          | 2          | 2                        | 2          |
| 35. Improvement of self-esteem                                                                     | 0                       | 0 | 2                          | 1          | 3                        | 1          |

| Outcome                                                                                                     | Importance <sup>a</sup> |   | Effectiveness <sup>b</sup> |            | Feasibility <sup>b</sup> |            |
|-------------------------------------------------------------------------------------------------------------|-------------------------|---|----------------------------|------------|--------------------------|------------|
|                                                                                                             | <i>n</i>                | % | <i>Me-dian</i>             | <i>IQR</i> | <i>Me-dian</i>           | <i>IQR</i> |
| 36. <b>More adaptive attitudes toward suicidality: suicide is mostly a symptom of severe mental illness</b> | 0                       | 0 | 2                          | 2          | 2                        | 2          |
| 37. Increase of knowledge of mental disorders                                                               | 0                       | 0 | 3                          | 3          | 3                        | 1          |
| 38. <b>More adaptive attitudes toward suicidality: suicide is not an option</b>                             | 0                       | 0 | 2                          | 3          | 2                        | 3          |

*Note.* **Outcomes in bold** are those where participants reached consensus both on their efficacy and feasibility.<sup>a</sup> Number of experts who chose the item as one of the five the most important, *N*=13.

<sup>b</sup> Items were rated on following Likert-scale: 1 (*not at all*), 2 (*to a small extent*), 3 (*to a moderate extent*), 4 (*to a great extent*).

<sup>c</sup> Outcome directly related to suicidality, question on the effectiveness for the reduction of suicidality long term is not applicable.

**Table S3**

*Items Regarding the Safety or Applicability of Awareness Programs*

| Item                                                                                                                                             | <i>Median</i> | <i>IQR</i> |
|--------------------------------------------------------------------------------------------------------------------------------------------------|---------------|------------|
| <b>1. When delivering universal suicide prevention programs, one must pay attention to potential unanticipated effects</b>                       | 4             | 1          |
| <b>2. Prevention programs should be tailored on specific characteristics of the audience:</b>                                                    |               |            |
| a) Age                                                                                                                                           | 4             | 1          |
| b) Gender                                                                                                                                        | 3             | 1          |
| c) Mental health status                                                                                                                          | 3             | 1          |
| d) Culture                                                                                                                                       | 3             | 0          |
| e) Suicidality                                                                                                                                   | 2.5           | 1          |
| <b>3. The benefits of suicide prevention programs outweigh the unanticipated consequences</b>                                                    | 3             | 1          |
| 4. <u>Suicide prevention programs should target only high-risk groups</u>                                                                        | 2             | 1          |
| 5. <u>Suicide prevention is not a theme for groups and should be treated individually</u>                                                        | 2             | 1          |
| 6. <u>Suicide prevention programs should be delivered only to interested students</u>                                                            | 2             | 1          |
| 7. <u>Suicide prevention programs do not have any adverse effects</u>                                                                            | 2             | 1          |
| 8. <u>Other types of suicide prevention in schools (e. g. gate-keeper trainings) are preferable to universal programs for suicide prevention</u> | 2             | 1          |
| 9. <u>Suicide prevention programs should not be disseminated in schools or areas already affected by suicide</u>                                 | 1             | 1          |
| 10. Suicide prevention programs should be delivered universally                                                                                  | 3             | 3          |
| 11. Talking about suicidality with young people lowers the threshold for suicidal behavior                                                       | 2             | 2          |
| 12. Talking about suicidality leads to an increased cognitive availability of suicidal behavior                                                  | 2             | 2          |

*Note.* Items for which consensus was reached and with a median above the middle value of the scale (**supported by the experts**) are highlighted in **bold**, items for which the participants did reach consensus but with a median below the middle value of the scale (rejected by the experts) are

---

underlined. Items were rated on the 4-point Likert scale: 1 – *strongly disagree*, 2 - *disagree*, 3 -

*agree*, 4 – *strongly agree*.



**Table S4***Precautions to Prevent Unanticipated Negative Effects*

| Item                                                                                                     | Median | IQR |
|----------------------------------------------------------------------------------------------------------|--------|-----|
| 1. ...embed suicide prevention in more general mental health fostering programs                          | 4      | 1   |
| 2. ...pilot the program with the target audience before delivering it more broadly                       | 4      | 0   |
| 3. ...measure long-term effects when piloting the program (e. g. after one year)                         | 4      | 1   |
| 4. ...not dramatize suicide                                                                              | 4      | 1   |
| 5. ...not mention details about suicidal behavior (e. g. methods)                                        | 4      | 1   |
| 6. ...redact a study protocol on how to react to individual risk prior to starting the program           | 4      | 1   |
| 7. ...address concerns of people about help-seeking in a credible and reassuring manner                  | 4      | 1   |
| 8. ...inform about ways to help yourself and others                                                      | 4      | 1   |
| 9. ...create the possibility to rapidly access appropriate treatment when needed as follow up to program | 4      | 0   |
| 10. ...provide teachers with methods to observe and follow up on the well-being of participants          | 4      | 1   |
| 11. ...train teachers and other school professionals to better assess suicidality and react to it        | 4      | 1   |
| 12. ...train gatekeepers at school to discuss suicidality and motivate help-seeking                      | 4      | 1   |
| 13. ...communicate openly with parents and teachers of students at risk of suicide                       | 4      | 1   |
| 14. ...establish durable public relations between school and mental health providers                     | 4      | 1   |
| 15. ...train parents to better assess suicidality and react to it                                        | 4      | 1   |
| 16. ...only use evidence-based interventions                                                             | 3.5    | 1   |
| 17. ...only use videos produced by / in cooperation with mental health professionals                     | 3      | 1   |
| 18. ...let two educators conduct the program together                                                    | 3      | 1   |
| 19. ...conduct a program with more than one session over a longer period (i.e. no punctual intervention) | 3      | 1   |
| 20. ...convey more adaptive attitudes towards suicide (e. g. "suicide is not an option")                 | 3      | 1   |

| Item                                                                                                                           | Median | IQR |
|--------------------------------------------------------------------------------------------------------------------------------|--------|-----|
| <b>21. ...inform participants about symptoms of depression</b>                                                                 | 3      | 1   |
| <b>22. ...include testimonies of young people who considered suicide but ruled it out as an option</b>                         | 3      | 1   |
| <b>23. ...indicate safe places where students can discuss suicidality</b>                                                      | 3      | 1   |
| <b>24. ...involve adolescents in expert rounds when deciding the contents of the program</b>                                   | 3      | 1   |
| <b>25. ...train gatekeepers to approach and inform parents of suicidal students</b>                                            | 3      | 1   |
| <b>26. ...let participating schools adopt policies about dealing with suicidality</b>                                          | 3      | 1   |
| <b>27. ...write a standardized script for the prevention program</b>                                                           | 3      | 1   |
| 28. ...only use short and clear messages when talking about suicidality (e. g. "if you are suicidal, talk to a trusted adult") | 2.5    | 1   |
| <u>29. ...conduct a screening for depression</u>                                                                               | 2      | 1   |
| <u>30. ...use more general terms (e. g. "self-injurious behavior") instead of mentioning "suicide"</u>                         | 1      | 1   |
| 31. ...document observations about the individual risk of suicidality of the participants                                      | 4      | 2   |
| 32. ...investigate the mental-health state of participants before starting the program                                         | 4      | 2   |
| 33. ...choose programs delivered by non-profit organizations                                                                   | 2      | 2   |
| 34. ...ask for the presence of a teacher in the class while the program is delivered                                           | 3      | 2   |
| 35. ...depict suicidality as mainly being a symptom of psychopathology                                                         | 1      | 2   |
| 36. ...focus on the biological causes of mental disorders                                                                      | 2      | 2   |

*Note.* Items for which there was consensus and have a median above the middle value of the scale

(**supported by the experts**) are highlighted in **bold**, items where the participants did reach consensus

but have a median below the middle value of the scale (rejected by the experts) are underlined.

Items were rated on the 4-point Likert scale: 1 - *I do not recommend doing this*, 2 - *not very*

*important*, 3 - *moderately important*, 4 - *very important*.

**Table S5**

*Useful Formats*

| Item                                                                                        | Median | IQR |
|---------------------------------------------------------------------------------------------|--------|-----|
| <b>1. A mix of intervention techniques</b>                                                  | 5      | 1   |
| <b>2. Signalize the presence of gate-keepers with whom to talk openly about suicidality</b> | 5      | 1   |
| <b>3. Brief and clear message about what to do in case of suicidality</b>                   | 5      | 1   |
| <b>4. Skills training for dealing with emotional distress</b>                               | 5      | 1   |
| <b>5. Peer-to-peer information</b>                                                          | 5      | 1   |
| <b>6. (Short) videos with discussion</b>                                                    | 4      | 1   |
| <b>7. Web-based self-management components (e. g. apps)</b>                                 | 4      | 1   |
| <b>8. Group discussions</b>                                                                 | 4      | 1   |
| <b>9. Information materials to take away</b>                                                | 4      | 1   |
| <b>10. Posters</b>                                                                          | 3      | 1   |
| <b>11. Short lecture</b>                                                                    | 3.5    | 1   |
| <b>12. Screening for depression</b>                                                         | 3      | 1   |
| 13. Role plays                                                                              | 4      | 2   |
| 14. Tools that support help-seeking (e.g. addresses, internet pages)                        | 5      | 2   |
| 15. Follow-up questionnaire                                                                 | 5      | 2   |
| 16. Communication training                                                                  | 4      | 2   |
| 17. Screening for suicidality                                                               | 4      | 2   |

*Note.* Items for which there was consensus and have a median above the middle value of the scale

(**supported by the experts**) are highlighted in **bold**. Items were rated on the 5-point Likert scale: 1 -

*not necessary, 2 - not very useful, 3 - somewhat useful, 4 - moderately useful, 5 - very useful.*

**Table S6***Important Characteristics of Educators*

| Item                                                                | Median | IQR |
|---------------------------------------------------------------------|--------|-----|
| <b>1. Experience in working with youth</b>                          | 5      | 1   |
| <b>2. Experience in working with mentally ill or suicidal youth</b> | 5      | 1   |
| <b>3. Appropriate training in delivering the prevention program</b> | 5      | 1   |
| <b>4. Founded knowledge on suicidality</b>                          | 5      | 1   |
| 5. Trusted by youth                                                 | 5      | 0   |
| 6. Believe in the program                                           | 5      | 1   |
| 7. Calm, balanced                                                   | 5      | 1   |
| 8. Open, can relate to youth                                        | 5      | 1   |
| 9. Is sensitive to the well-being of participants                   | 5      | 1   |
| 10. Good knowledge of own professional limits                       | 5      | 1   |
| 11. Pedagogical training/knowledge                                  | 5      | 1   |
| 12. Mentally healthy                                                | 5      | 2   |

*Note.* Items for which there was consensus and have a median above the middle value of the scale (**supported by the experts**) are highlighted in **bold**. Items were rated on the 5-point Likert scale: 1 - detrimental, 2 - not very important, 3 - somewhat important, 4 - moderately important, 5 - very important.

**Table S7***Most Indicated Profession of Educators*

|    | Profession                 | Mean Rank |
|----|----------------------------|-----------|
| 1. | School psychologist        | 1.93      |
| 2. | Psychologist               | 2.93      |
| 3. | Trained teachers           | 4.00      |
| 4. | Psychotherapists           | 4.20      |
| 5. | Social workers             | 4.20      |
| 6. | Doctors                    | 4.53      |
| 7. | Other health professionals | 6.20      |
